# Supplementary material for: Coordination of Cu2+and Ni2+ with the histone model peptide of H2B N-terminal tail (1-31 residues): A spectroscopic study
Source: Royal Society of Chemistry journal article supplement (doi:10.1039/b927157k), 2010-01-01
Supplement: b927157k.pdf [file b927157k.pdf]

# Coordination of $\text{Cu}^{2+}$ and $\text{Ni}^{2+}$ with the Histone Model Peptide of H2B N-terminal tail (1-31 residues): A Spectroscopic Study.

*Ana Mónica Nunes, Kimon Zavitsanos, Gerasimos Malandrinos\* and Nick Hadjiliadis\**

Department of Chemistry, University of Ioannina, 45110 Ioannina, Greece

**Supporting Information**

## Table of Contents

|                                                                                                                                     |     |
|-------------------------------------------------------------------------------------------------------------------------------------|-----|
| Table S1: Acquisition parameters of NMR experiments.                                                                                | S3  |
| Figure S1: Overlaid NOESY and TOCSY spectra of H2B <sub>1-31</sub> at pH 2.                                                         | S3  |
| Table S2: Resonances assignment for H2B <sub>1-31</sub> at pH 2.                                                                    | S4  |
| Table S3: Resonance assignments for H2B <sub>1-31</sub> (free and Ni <sup>2+</sup> -bound state) and $\Delta\delta$ .               | S9  |
| Figure S2: <sup>1</sup> H NMR stack plot showing the effect of Cu <sup>2+</sup> addition to H2B <sub>1-31</sub> .                   | S15 |
| Figure S3: Overlaid aliphatic region of the free and Ni <sup>2+</sup> -bound H2B <sub>1-31</sub> of NOESY spectra at pH 10.         | S16 |
| Figure S4: UV/Vis spectra of the Ni <sup>2+</sup> : H2B <sub>1-31</sub> system.                                                     | S16 |
| Figure S5: Overlaid aliphatic region of the free H2B <sub>1-31</sub> and Ni <sup>2+</sup> -bound H2B <sub>1-31</sub> TOCSY spectra. | S17 |

**Table S1.** Acquisition parameters of NMR experiments performed on H2B<sub>1-31</sub> at 298K.

| Experiments                                                   | Acquired data points (nucleus) |                        |                        | Spectral width (ppm) |                       |                      |
|---------------------------------------------------------------|--------------------------------|------------------------|------------------------|----------------------|-----------------------|----------------------|
|                                                               | t <sub>1</sub>                 | t <sub>2</sub>         | t <sub>3</sub>         | F <sub>1</sub>       | F <sub>2</sub>        | F <sub>3</sub>       |
| [ <sup>1</sup> H, <sup>1</sup> H]-TOCSY <sup>[a][ b]</sup>    | 2048 ( <sup>1</sup> H)         | 672 ( <sup>1</sup> H)  | -                      | 10 ( <sup>1</sup> H) | 10 ( <sup>1</sup> H)  | -                    |
| [ <sup>1</sup> H, <sup>1</sup> H]-NOESY <sup>[a][ b]</sup>    | 2048 ( <sup>1</sup> H)         | 640 ( <sup>1</sup> H)  | -                      | 11 ( <sup>1</sup> H) | 11 ( <sup>1</sup> H)  | -                    |
| [ <sup>1</sup> H, <sup>13</sup> C]-HSQC <sup>[a][ b][c]</sup> | 1024 ( <sup>1</sup> H)         | 512 ( <sup>13</sup> C) | -                      | 11 ( <sup>1</sup> H) | 80 ( <sup>13</sup> C) | -                    |
| [ <sup>1</sup> H, <sup>15</sup> N]-HSQC <sup>[a]</sup>        | 1024 ( <sup>1</sup> H)         | 256 ( <sup>15</sup> N) | -                      | 12 ( <sup>1</sup> H) | 40 ( <sup>15</sup> N) | -                    |
| HNHA <sup>[a]</sup>                                           | 128 ( <sup>1</sup> H)          | 16 ( <sup>15</sup> N)  | 1024 ( <sup>1</sup> H) | 13 ( <sup>1</sup> H) | 37 ( <sup>15</sup> N) | 13 ( <sup>1</sup> H) |

[a] Data acquired on a 700 spectrometer, equipped with a triple resonance TXI Z-GRAD 5 mm.

[b] Data acquired on a 600 MHz spectrometer equipped with a triple resonance TXI Z-GRAD 5 mm and TXI Z-GRAD with ATMM 5 mm probe, for the Ni<sup>2+</sup>-free and bound H2B<sub>1-31</sub> spectra, respectively.

[c] Data acquired on a 400 MHz spectrometer equipped with a triple resonance TXI BBO 5 mm probe (for Cu<sup>2+</sup>-H2B<sub>1-31</sub> complexes).

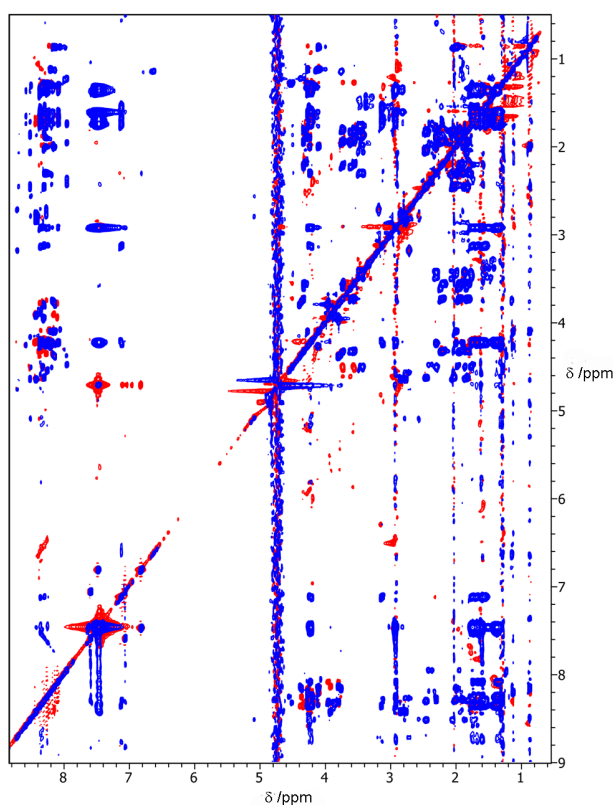

**Figure S1.** Overlaid NOESY (red) and TOCSY (blue) spectra of H2B<sub>1-31</sub> at pH 2, 298 K.

**Table S2.** Resonance assignments for H2B<sub>1-31</sub> at pH 2, 298 K (ppm related to TMS).

| Residue | Atom                           | δ/ppm | Residue          | Atom                         | δ/ppm                        | Residue                      | Atom                         | δ/ppm                       |       |
|---------|--------------------------------|-------|------------------|------------------------------|------------------------------|------------------------------|------------------------------|-----------------------------|-------|
| Pro1    | <sup>1</sup> Hα                | 4.50  | Pro3             | <sup>1</sup> Hγ <sub>2</sub> | 1.93                         | Lys5                         | <sup>13</sup> Cγ             | 22.0                        |       |
|         | <sup>1</sup> Hβ <sub>2</sub>   | 2.30  |                  | <sup>1</sup> Hγ <sub>3</sub> | 1.83                         |                              | <sup>13</sup> Cδ             | 26.3                        |       |
|         | <sup>1</sup> Hβ <sub>3</sub>   | 1.98  |                  | <sup>13</sup> Cα             | 60.39                        |                              | <sup>13</sup> Cε             | 39.3                        |       |
|         | <sup>1</sup> Hδ <sub>2</sub>   | 3.46  |                  | <sup>13</sup> Cβ             | 29.35                        |                              | Ser6                         | <sup>1</sup> H <sub>N</sub> | 8.16  |
|         | <sup>1</sup> Hδ <sub>3</sub>   | 3.42  |                  | <sup>13</sup> Cγ             | 29.31                        |                              |                              | <sup>1</sup> Hα             | 4.36  |
|         | <sup>1</sup> Hγ <sub>2</sub>   | 1.88  |                  | <sup>13</sup> Cδ             | 47.92                        |                              | <sup>1</sup> Qβ              | 3.75                        |       |
|         | <sup>1</sup> Hγ <sub>3</sub>   | 1.76  |                  | Ala4                         | <sup>1</sup> H <sub>N</sub>  |                              | 8.25                         | <sup>15</sup> N             | 116.9 |
|         | <sup>13</sup> Cα               | 61.2  |                  |                              | <sup>1</sup> Hα              |                              | 4.23                         | <sup>13</sup> Cα            | 55.3  |
|         | <sup>13</sup> Cβ               | 27.0  |                  | <sup>1</sup> Qβ              | 1.32                         |                              | <sup>13</sup> Cβ             | 61.3                        |       |
|         | <sup>13</sup> Cγ               | 24.3  |                  | <sup>15</sup> N              | 125.6                        |                              | Ala7                         | <sup>1</sup> H <sub>N</sub> | 8.25  |
|         | <sup>13</sup> Cδ               | 47.2  |                  | <sup>13</sup> Cα             | 49.8                         |                              |                              | <sup>1</sup> Hα             | 4.54  |
| Glu2    | <sup>1</sup> H <sub>N</sub>    | 8.30  | <sup>13</sup> Cβ | 16.4                         | <sup>1</sup> Qβ              | 1.27                         |                              |                             |       |
|         | <sup>1</sup> Hα                | 4.62  | Lys5             | <sup>1</sup> H <sub>N</sub>  | 8.25                         | <sup>15</sup> N              | 127.2                        |                             |       |
|         | <sup>1</sup> Hβ <sub>2</sub>   | 2.03  |                  | <sup>1</sup> Hα              | 4.25                         | <sup>13</sup> Cα             | 47.8                         |                             |       |
|         | <sup>1</sup> Hβ <sub>3</sub>   | 1.83  |                  | <sup>1</sup> Hβ <sub>2</sub> | 1.74                         | <sup>13</sup> Cβ             | 15.3                         |                             |       |
|         | <sup>1</sup> Qγ <sup>[a]</sup> | 2.45  |                  | <sup>1</sup> Hβ <sub>3</sub> | 1.67                         | Pro8                         | <sup>1</sup> Hα              | 4.33                        |       |
|         | <sup>15</sup> N                | 120.4 |                  | <sup>1</sup> Qγ              | 1.37                         |                              | <sup>1</sup> Qβ              | 2.19                        |       |
|         | <sup>13</sup> Cα               | 50.8  |                  | <sup>1</sup> Qδ              | 1.60                         |                              | <sup>1</sup> Hγ <sub>2</sub> | 1.90                        |       |
|         | <sup>13</sup> Cβ               | 25.7  |                  | <sup>1</sup> Qε              | 2.92                         |                              | <sup>1</sup> Hγ <sub>3</sub> | 1.81                        |       |
| Pro3    | <sup>1</sup> Hα                | 4.33  |                  | <sup>1</sup> Qz              | 7.46                         | <sup>1</sup> Hδ <sub>2</sub> | 3.73                         |                             |       |
|         | <sup>1</sup> Qβ                | 2.23  | <sup>15</sup> N  | 120.6                        | <sup>1</sup> Hδ <sub>3</sub> | 3.56                         |                              |                             |       |
|         | <sup>1</sup> Hδ <sub>2</sub>   | 3.72  | <sup>13</sup> Cα | 53.6                         | <sup>13</sup> Cα             | 60.0                         |                              |                             |       |
|         | <sup>1</sup> Hδ <sub>3</sub>   | 3.62  | <sup>13</sup> Cβ | 30.2                         | <sup>13</sup> Cβ             | 29.9                         |                              |                             |       |

<sup>[a]</sup> Q= Equivalent protons.

**Table S2.** (Continuation) Resonance assignments for H2B<sub>1-31</sub> at pH 2, 298 K (ppm related to TMS).

| Residue | Atom                           | δ/ppm | Residue | Atom                         | δ/ppm | Residue | Atom                         | δ/ppm  |
|---------|--------------------------------|-------|---------|------------------------------|-------|---------|------------------------------|--------|
| Pro8    | <sup>13</sup> Cγ               | 24.6  | Lys11   | <sup>1</sup> Qε              | 2.92  | Gly13   | <sup>15</sup> N              | 110.6  |
|         | <sup>13</sup> Cδ               | 47.8  |         | <sup>1</sup> Qz              | 7.5   |         | <sup>13</sup> Cα             | 42.4   |
| Ala9    | <sup>1</sup> H <sub>N</sub>    | 8.32  |         | <sup>15</sup> N              | 123.3 | Ser14   | <sup>1</sup> H <sub>N</sub>  | 8.14   |
|         | <sup>1</sup> Hα                | 4.51  |         | <sup>13</sup> Cα             | 53.6  |         | <sup>1</sup> Hα              | 4.38   |
|         | <sup>1</sup> Qβ <sup>[a]</sup> | 1.28  |         | <sup>13</sup> Cβ             | 30.3  |         | <sup>1</sup> Qβ              | 3.79   |
|         | <sup>15</sup> N                | 125.8 |         | <sup>13</sup> Cγ             | 22.0  |         | <sup>15</sup> N              | 115.51 |
|         | <sup>13</sup> Cα               | 47.6  |         | <sup>13</sup> Cδ             | 28.2  |         | <sup>13</sup> Cα             | 55.51  |
|         | <sup>13</sup> Cβ               | 15.4  |         | <sup>13</sup> Cε             | 39.4  |         | <sup>13</sup> Cβ             | 61.38  |
| Pro10   | <sup>1</sup> Hα                | 4.33  | Lys12   | <sup>1</sup> H <sub>N</sub>  | 8.29  | Lys15   | <sup>1</sup> H <sub>N</sub>  | 8.35   |
|         | <sup>1</sup> Qβ                | 2.22  |         | <sup>1</sup> Hα              | 4.24  |         | <sup>1</sup> Hα              | 4.23   |
|         | <sup>1</sup> Hγ <sub>2</sub>   | 1.96  |         | <sup>1</sup> Hβ <sub>2</sub> | 1.75  |         | <sup>1</sup> Hβ <sub>2</sub> | 1.74   |
|         | <sup>1</sup> Hγ <sub>3</sub>   | 1.82  |         | <sup>1</sup> Hβ <sub>3</sub> | 1.67  |         | <sup>1</sup> Hβ <sub>3</sub> | 1.67   |
|         | <sup>1</sup> Hδ <sub>2</sub>   | 3.73  |         | <sup>1</sup> Qγ              | 1.39  |         | <sup>1</sup> Qγ              | 1.36   |
|         | <sup>1</sup> Hδ <sub>3</sub>   | 3.55  |         | <sup>1</sup> Qδ              | 1.60  |         | <sup>1</sup> Qδ              | 1.59   |
|         | <sup>13</sup> Cα               | 60.1  |         | <sup>1</sup> Qε              | 2.91  |         | <sup>1</sup> Qε              | 2.91   |
|         | <sup>13</sup> Cβ               | 29.3  |         | <sup>1</sup> Qz              | 7.46  |         | <sup>1</sup> Qz              | 7.48   |
|         | <sup>13</sup> Cγ               | 24.6  |         | <sup>15</sup> N              | 123.1 |         | <sup>15</sup> N              | 122.9  |
|         | <sup>13</sup> Cδ               | 48.6  |         | <sup>13</sup> Cα             | 53.6  |         | <sup>13</sup> Cα             | 53.6   |
| Lys11   | <sup>1</sup> H <sub>N</sub>    | 8.37  |         | <sup>13</sup> Cβ             | 30.4  |         | <sup>13</sup> Cβ             | 30.4   |
|         | <sup>1</sup> Hα                | 4.25  |         | <sup>13</sup> Cγ             | 21.9  |         | <sup>13</sup> Cγ             | 22.0   |
|         | <sup>1</sup> Hβ <sub>2</sub>   | 1.75  |         | <sup>13</sup> Cδ             | 26.4  |         | <sup>13</sup> Cδ             | 26.4   |
|         | <sup>1</sup> Hβ <sub>3</sub>   | 1.68  |         | <sup>13</sup> Cε             | 39.4  |         | <sup>13</sup> Cε             | 39.4   |
|         | <sup>1</sup> Qγ                | 1.35  | Gly13   | <sup>1</sup> H <sub>N</sub>  | 8.42  | Lys16   | <sup>1</sup> H <sub>N</sub>  | 8.30   |
|         | <sup>1</sup> Qδ                | 1.55  |         | <sup>1</sup> Qα              | 3.92  |         | <sup>1</sup> Hα              | 4.22   |

<sup>[a]</sup> Q= Equivalent protons.

**Table S2.** (Continuation) Resonance assignments for H2B<sub>1-31</sub> at pH 2, 298 K (ppm related to TMS).

| Residue | Atom                           | δ/ppm | Residue | Atom                          | δ/ppm | Residue | Atom                          | δ/ppm |
|---------|--------------------------------|-------|---------|-------------------------------|-------|---------|-------------------------------|-------|
| Lys16   | <sup>1</sup> Hβ <sub>2</sub>   | 1.76  | Val18   | <sup>13</sup> Cα              | 59.5  | Lys20   | <sup>13</sup> Cδ              | 26.3  |
|         | <sup>1</sup> Hβ <sub>3</sub>   | 1.69  |         | <sup>13</sup> Cβ              | 30.1  |         | <sup>13</sup> Cε              | 39.4  |
|         | <sup>1</sup> Qγ <sup>[a]</sup> | 1.38  |         | <sup>13</sup> Cγ <sub>1</sub> | 17.7  | Ala21   | <sup>1</sup> H <sub>N</sub>   | 8.23  |
|         | <sup>1</sup> Qδ                | 1.60  |         | <sup>13</sup> Cγ <sub>2</sub> | 18.4  |         | <sup>1</sup> Hα               | 4.20  |
|         | <sup>1</sup> Qε                | 2.92  | Thr19   | <sup>1</sup> H <sub>N</sub>   | 8.20  |         | <sup>1</sup> Qβ               | 1.29  |
|         | <sup>1</sup> Qz                | 7.46  |         | <sup>1</sup> Hα               | 4.26  |         | <sup>15</sup> N               | 125.4 |
|         | <sup>15</sup> N                | 124.2 |         | <sup>1</sup> Hβ               | 4.10  |         | <sup>13</sup> Cα              | 49.8  |
|         | <sup>13</sup> Cα               | 53.5  |         | <sup>1</sup> Qγ <sub>2</sub>  | 1.13  |         | <sup>13</sup> Cβ              | 16.4  |
|         | <sup>13</sup> Cβ               | 30.3  |         | <sup>15</sup> N               | 119.3 | Gln22   | <sup>1</sup> H <sub>N</sub>   | 8.28  |
|         | <sup>13</sup> Cγ               | 22.0  |         | <sup>13</sup> Cα              | 59.0  |         | <sup>1</sup> Hα               | 4.24  |
|         | <sup>13</sup> Cδ               | 26.2  |         | <sup>13</sup> Cβ              | 67.2  |         | <sup>1</sup> Hβ <sub>2</sub>  | 2.00  |
|         | <sup>13</sup> Cε               | 39.5  |         | <sup>13</sup> Cγ <sub>2</sub> | 18.8  |         | <sup>1</sup> Hβ <sub>3</sub>  | 1.89  |
| Ala17   | <sup>1</sup> H <sub>N</sub>    | 8.28  | Lys20   | <sup>1</sup> H <sub>N</sub>   | 8.23  |         | <sup>1</sup> Qγ               | 2.32  |
|         | <sup>1</sup> Hα                | 4.27  |         | <sup>1</sup> Hα               | 4.21  |         | <sup>1</sup> Hε <sub>21</sub> | 7.59  |
|         | <sup>1</sup> Qβ                | 1.29  |         | <sup>1</sup> Hβ <sub>2</sub>  | 1.73  |         | <sup>1</sup> Hε <sub>22</sub> | 7.05  |
|         | <sup>15</sup> N                | 126.3 |         | <sup>1</sup> Hβ <sub>3</sub>  | 1.67  |         | <sup>14</sup> N               | 120.3 |
|         | <sup>13</sup> Cα               | 49.5  |         | <sup>1</sup> Qγ               | 1.38  |         | <sup>15</sup> Nε <sub>2</sub> | 108.8 |
|         | <sup>13</sup> Cβ               | 16.5  |         | <sup>1</sup> Qδ               | 1.61  |         | <sup>13</sup> Cα              | 53.1  |
| Val18   | <sup>1</sup> H <sub>N</sub>    | 8.16  |         | <sup>1</sup> Qε               | 2.92  |         | <sup>13</sup> Cβ              | 27.0  |
|         | <sup>1</sup> Hα                | 4.10  |         | <sup>1</sup> Qz               | 7.47  |         | <sup>13</sup> Cγ              | 31.1  |
|         | <sup>1</sup> Hβ                | 2.00  |         | <sup>15</sup> N               | 122.8 | Lys23   | <sup>1</sup> H <sub>N</sub>   | 8.33  |
|         | <sup>1</sup> Qγ <sub>1</sub>   | 0.88  |         | <sup>13</sup> Cα              | 53.6  |         | <sup>1</sup> Hα               | 4.21  |
|         | <sup>1</sup> Qγ <sub>2</sub>   | 0.86  |         | <sup>13</sup> Cβ              | 30.5  |         | <sup>1</sup> Hβ <sub>2</sub>  | 1.75  |
|         | <sup>15</sup> N                | 120.4 |         | <sup>13</sup> Cγ              | 22.0  |         | <sup>1</sup> Hβ <sub>3</sub>  | 1.67  |

<sup>[a]</sup> Q= Equivalent protons.

**Table S2.** (Continuation) Resonance assignments for H2B<sub>1-31</sub> at pH 2, 298 K (ppm related to TMS).

| Residue | Atom                                       | δ/ppm | Residue | Atom                                     | δ/ppm   | Residue | Atom                                     | δ/ppm   |
|---------|--------------------------------------------|-------|---------|------------------------------------------|---------|---------|------------------------------------------|---------|
| Lys23   | <sup>1</sup> Q <sup>γ</sup> <sup>[a]</sup> | 1.32  | Asp25   | <sup>1</sup> H <sub>N</sub>              | 8.42    | Lys27   | <sup>13</sup> C <sup>γ</sup>             | 21.981  |
|         | <sup>1</sup> Q <sup>δ</sup>                | 1.61  |         | <sup>1</sup> H <sup>α</sup>              | 4.64    |         | <sup>13</sup> C <sup>δ</sup>             | 26.284  |
|         | <sup>1</sup> Q <sup>ε</sup>                | 2.93  |         | <sup>1</sup> H <sup>β</sup> <sub>2</sub> | 2.84    |         | <sup>13</sup> C <sup>ε</sup>             | 39.304  |
|         | <sup>1</sup> Q <sup>z</sup>                | 7.47  |         | <sup>1</sup> H <sup>β</sup> <sub>3</sub> | 2.78    | Lys28   | <sup>1</sup> H <sub>N</sub>              | 8.237   |
|         | <sup>15</sup> N                            | 124.4 |         | <sup>15</sup> N                          | 120.5   |         | <sup>1</sup> H <sup>α</sup>              | 4.211   |
|         | <sup>13</sup> C <sup>α</sup>               | 53.6  |         | <sup>13</sup> C <sup>α</sup>             | 50.4    |         | <sup>1</sup> Q <sup>β</sup>              | 1.728   |
|         | <sup>13</sup> C <sup>β</sup>               | 30.3  |         | <sup>13</sup> C <sup>β</sup>             | 36.0    |         | <sup>1</sup> H <sup>γ</sup> <sub>2</sub> | 1.366   |
|         | <sup>13</sup> C <sup>γ</sup>               | 22.0  | Asp25   | <sup>1</sup> H <sub>N</sub>              | 8.31    |         | <sup>1</sup> H <sup>γ</sup> <sub>3</sub> | 1.309   |
|         | <sup>13</sup> C <sup>δ</sup>               | 26.4  |         | <sup>1</sup> H <sup>α</sup> <sub>1</sub> | 3.79    |         | <sup>1</sup> Q <sup>δ</sup>              | 1.624   |
|         | <sup>13</sup> C <sup>ε</sup>               | 39.3  |         | <sup>1</sup> H <sup>α</sup> <sub>2</sub> | 3.94    |         | <sup>1</sup> Q <sup>ε</sup>              | 2.921   |
| Lys24   | <sup>1</sup> H <sub>N</sub>                | 8.35  |         | <sup>15</sup> N                          | 109.537 |         | <sup>1</sup> Q <sup>z</sup>              | 7.459   |
|         | <sup>1</sup> H <sup>α</sup>                | 4.22  |         | <sup>13</sup> C <sup>α</sup>             | 42.633  |         | <sup>15</sup> N                          | 123.296 |
|         | <sup>1</sup> H <sup>β</sup> <sub>2</sub>   | 1.75  | Lys27   | <sup>1</sup> H <sub>N</sub>              | 8.08    | Lys28   | <sup>13</sup> C <sup>α</sup>             | 53.738  |
|         | <sup>1</sup> H <sup>β</sup> <sub>3</sub>   | 1.67  |         | <sup>1</sup> H <sup>α</sup>              | 4.233   |         | <sup>13</sup> C <sup>β</sup>             | 30.33   |
|         | <sup>1</sup> Q <sup>γ</sup>                | 1.34  |         | <sup>1</sup> H <sup>β</sup> <sub>2</sub> | 1.732   |         | <sup>13</sup> C <sup>γ</sup>             | 22.067  |
|         | <sup>1</sup> Q <sup>δ</sup>                | 1.60  |         | <sup>1</sup> H <sup>β</sup> <sub>3</sub> | 1.671   |         | <sup>13</sup> C <sup>δ</sup>             | 26.242  |
|         | <sup>1</sup> Q <sup>ε</sup>                | 2.91  |         | <sup>1</sup> H <sup>γ</sup> <sub>2</sub> | 1.37    |         | <sup>13</sup> C <sup>ε</sup>             | 39.207  |
|         | <sup>1</sup> Q <sup>z</sup>                | 7.49  |         | <sup>1</sup> H <sup>γ</sup> <sub>3</sub> | 1.32    | Arg29   | <sup>1</sup> H <sub>N</sub>              | 8.349   |
|         | <sup>15</sup> N                            | 123.6 |         | <sup>1</sup> Q <sup>δ</sup>              | 1.6     |         | <sup>1</sup> H <sup>α</sup>              | 4.207   |
|         | <sup>13</sup> C <sup>α</sup>               | 53.6  |         | <sup>1</sup> Q <sup>ε</sup>              | 2.91    |         | <sup>1</sup> H <sup>β</sup> <sub>2</sub> | 1.69    |
|         | <sup>13</sup> C <sup>β</sup>               | 30.4  |         | <sup>1</sup> Q <sup>z</sup>              | 7.467   |         | <sup>1</sup> H <sup>β</sup> <sub>3</sub> | 1.763   |
|         | <sup>13</sup> C <sup>γ</sup>               | 22.0  |         | <sup>15</sup> N                          | 120.73  |         | <sup>1</sup> Q <sup>γ</sup>              | 1.588   |
|         | <sup>13</sup> C <sup>δ</sup>               | 26.4  |         | <sup>13</sup> C <sup>α</sup>             | 53.668  |         | <sup>1</sup> Q <sup>δ</sup>              | 3.134   |
|         | <sup>13</sup> C <sup>ε</sup>               | 39.4  |         | <sup>13</sup> C <sup>β</sup>             | 30.301  |         | <sup>1</sup> H <sup>ε</sup>              | 7.124   |

<sup>[a]</sup> Q= Equivalent protons.

**Table S2.** (Continuation) Resonance assignments for H2B<sub>1-31</sub> at pH 2, 298 K (ppm related to TMS).

| Residue | Atom                          | δ/ppm   | Residue | Atom                           | δ/ppm   | Residue | Atom                          | δ/ppm   |
|---------|-------------------------------|---------|---------|--------------------------------|---------|---------|-------------------------------|---------|
| Arg29   | <sup>1</sup> H <sub>H21</sub> | 7.46    | Lys30   | <sup>1</sup> Qδ <sup>[a]</sup> | 1.601   | Arg31   | <sup>1</sup> Hβ <sub>3</sub>  | 1.67    |
|         | <sup>1</sup> H <sub>H22</sub> | 6.809   |         | <sup>1</sup> Qε                | 2.918   |         | <sup>1</sup> Qγ               | 1.56    |
|         | <sup>15</sup> N               | 121.988 |         | <sup>1</sup> Qz                | 7.462   |         | <sup>1</sup> Qδ               | 3.122   |
|         | <sup>15</sup> N <sub>H2</sub> | 111.85  |         | <sup>15</sup> N                | 123.279 |         | <sup>1</sup> He               | 7.108   |
|         | <sup>13</sup> Cα              | 53.461  |         | <sup>13</sup> Cα               | 53.434  |         | <sup>1</sup> H <sub>H21</sub> | 7.462   |
|         | <sup>13</sup> Cβ              | 28.155  |         | <sup>13</sup> Cβ               | 30.296  |         | <sup>1</sup> H <sub>H22</sub> | 6.799   |
|         | <sup>13</sup> Cγ              | 24.36   |         | <sup>13</sup> Cγ               | 21.976  |         | <sup>15</sup> N               | 121.152 |
|         | <sup>13</sup> Cδ              | 40.583  |         | <sup>13</sup> Cδ               | 26.357  |         | <sup>15</sup> N <sub>H2</sub> | 112.363 |
| Lys30   | <sup>1</sup> H <sub>N</sub>   | 8.323   |         | <sup>13</sup> Cε               | 39.263  |         | <sup>13</sup> Cα              | 53.488  |
|         | <sup>1</sup> Hα               | 4.193   | Arg31   | <sup>1</sup> H <sub>N</sub>    | 8.295   |         | <sup>13</sup> Cβ              | 28.293  |
|         | <sup>1</sup> Hβ <sub>2</sub>  | 1.741   |         | <sup>1</sup> Hα                | 4.248   |         | <sup>13</sup> Cγ              | 40.687  |
|         | <sup>1</sup> Hβ <sub>3</sub>  | 1.67    |         | <sup>1</sup> Hβ <sub>2</sub>   | 1.742   |         | <sup>13</sup> Cδ              | 24.354  |
|         | <sup>1</sup> Qγ               | 1.327   |         |                                |         |         |                               |         |

<sup>[a]</sup> Q= Equivalent protons.



**Table S3.** Resonance assignments for H2B<sub>1-31</sub> (free and Ni<sup>2+</sup>-bound state) and chemical shifts differences at pH 10.1, 298K (ppm related to TMS).

| Residue                                | Atom                      | Free/ppm                 | Ni <sup>2+</sup> -bound/ppm | $\Delta\delta$ /ppm | Residue                    | Atom                      | Free/ppm                 | Ni <sup>2+</sup> -bound/ppm | $\Delta\delta$ /ppm |       |
|----------------------------------------|---------------------------|--------------------------|-----------------------------|---------------------|----------------------------|---------------------------|--------------------------|-----------------------------|---------------------|-------|
| Pro1                                   | <sup>1</sup> H $\alpha$   | 4.504                    | 4.510                       | 0.01                | Pro3                       | <sup>1</sup> H $\gamma_2$ | 3.774                    | 3.770                       | 0.00                |       |
|                                        | <sup>1</sup> H $\beta_2$  | 2.304                    | 2.307                       | 0.00                |                            | <sup>1</sup> H $\gamma_3$ | 3.635                    | 3.640                       | 0.01                |       |
|                                        | <sup>1</sup> H $\beta_3$  | 1.999                    | 2.000                       | 0.00                |                            | <sup>13</sup> C $\alpha$  | 60.465                   | 60.469                      | 0.00                |       |
|                                        | <sup>1</sup> H $\delta_2$ | 1.876                    | 1.880                       | 0.00                |                            | <sup>13</sup> C $\beta$   | 29.260                   | 29.319                      | 0.06                |       |
|                                        | <sup>1</sup> H $\delta_3$ | 1.787                    | 1.800                       | 0.01                |                            | <sup>13</sup> C $\delta$  | 47.975                   | 48.096                      | 0.12                |       |
|                                        | <sup>1</sup> H $\gamma_2$ | 3.477                    | 3.478                       | 0.00                |                            | <sup>13</sup> C $\gamma$  | 24.613                   | 24.664                      | 0.05                |       |
|                                        | <sup>1</sup> H $\gamma_3$ | 3.434                    | 3.434                       | 0.00                |                            | Ala4                      | <sup>1</sup> H $\alpha$  | 4.229                       | 4.224               | 0.00  |
|                                        | <sup>13</sup> C $\alpha$  | 61.186                   | 61.210                      | 0.02                |                            |                           | <sup>1</sup> Q $\beta$   | 1.327                       | 1.329               | 0.00  |
|                                        | <sup>13</sup> C $\beta$   | 26.886                   | -                           | -                   |                            |                           | <sup>13</sup> C $\alpha$ | 49.733                      | 49.758              | 0.03  |
|                                        | <sup>13</sup> C $\gamma$  | 24.196                   | 24.215                      | 0.02                |                            |                           | <sup>13</sup> C $\beta$  | 16.207                      | 16.290              | 0.08  |
|                                        | Glu2                      | <sup>13</sup> C $\delta$ | 46.706                      | 46.651              |                            | -0.05                     | Lys5                     | <sup>1</sup> H $\alpha$     | 4.264               | 4.271 |
| <sup>1</sup> H $\alpha$                |                           | 4.513                    | 4.509                       | 0.00                | <sup>1</sup> H $\beta_2$   | 1.787                     |                          | 1.784                       | 0.00                |       |
| <sup>1</sup> H $\beta_2$               |                           | 1.947                    | 1.963                       | 0.02                | <sup>1</sup> H $\beta_3$   | 1.700                     |                          | 1.707                       | 0.01                |       |
| <sup>1</sup> H $\beta_3$               |                           | 1.842                    | 1.851                       | 0.01                | <sup>1</sup> Q $\gamma$    | 1.573                     |                          | 1.378                       | -0.20               |       |
| <sup>1</sup> Q $\gamma$ <sup>[a]</sup> |                           | 2.240                    | 2.244                       | 0.00                | <sup>1</sup> Q $\delta$    | 1.378                     |                          | 1.584                       | 0.21                |       |
| <sup>13</sup> C $\alpha$               |                           | 51.761                   | 51.598                      | -0.16               | <sup>1</sup> Q $\epsilon$  | 2.841                     |                          | 2.859                       | 0.02                |       |
| <sup>13</sup> C $\beta$                |                           | 27.085                   | 27.058                      | -0.03               | <sup>13</sup> C $\alpha$   | 53.442                    |                          | 53.466                      | 0.02                |       |
| Pro3                                   | <sup>13</sup> C $\gamma$  | 33.342                   | 33.278                      | -0.06               | <sup>13</sup> C $\beta$    | 30.402                    | 27.034                   | -3.37                       |                     |       |
|                                        | <sup>1</sup> H $\alpha$   | 4.326                    | 4.326                       | 0.00                | <sup>13</sup> C $\gamma$   | 22.126                    | 30.334                   | 8.21                        |                     |       |
|                                        | <sup>1</sup> Q $\beta$    | 2.237                    | 2.245                       | 0.01                | <sup>13</sup> C $\delta$   | 27.234                    | 22.017                   | -5.22                       |                     |       |
|                                        | <sup>1</sup> H $\delta_2$ | 1.959                    | 1.960                       | 0.00                | <sup>13</sup> C $\epsilon$ | 39.394                    | 39.440                   | 0.05                        |                     |       |
|                                        | <sup>1</sup> H $\delta_3$ | 1.846                    | 1.851                       | 0.00                | Ser6                       | <sup>1</sup> H $\alpha$   | 4.376                    | 4.371                       | 0.00                |       |

<sup>[a]</sup> Q= Equivalent protons.

**Table S3.** (Continuation) Resonance assignments for H2B<sub>1-31</sub> (free and Ni<sup>2+</sup>-bound state) and chemical shifts differences at pH 10.1, 298K (ppm related to TMS).

| Residue                   | Atom                                  | Free/ppm                | Ni <sup>2+</sup> -bound/ppm | $\Delta\delta$ /ppm     | Residue                    | Atom                      | Free/ppm                 | Ni <sup>2+</sup> -bound/ppm | $\Delta\delta$ /ppm |      |
|---------------------------|---------------------------------------|-------------------------|-----------------------------|-------------------------|----------------------------|---------------------------|--------------------------|-----------------------------|---------------------|------|
| Ser6                      | <sup>1</sup> H $\beta_2$              | 3.768                   | 3.765                       | 0.00                    | Pro10                      | <sup>1</sup> H $\alpha$   | 4.350                    | 4.357                       | 0.01                |      |
|                           | <sup>1</sup> H $\beta_3$              | 3.825                   | -                           | -                       |                            | <sup>1</sup> Q $\beta$    | 2.218                    | 2.220                       | 0.00                |      |
|                           | <sup>13</sup> C $\alpha$              | 55.182                  | 55.229                      | 0.05                    |                            | <sup>1</sup> H $\gamma_2$ | 1.960                    | 1.966                       | 0.01                |      |
|                           | <sup>13</sup> C $\beta$               | 61.153                  | 61.042                      | -0.11                   |                            | <sup>1</sup> H $\gamma_3$ | 1.812                    | 1.816                       | 0.00                |      |
| Ala7                      | <sup>1</sup> H $\alpha$               | 4.553                   | 4.563                       | 0.01                    | HD2                        | 3.747                     | 3.744                    | 0.00                        |                     |      |
|                           | <sup>1</sup> Q $\beta$                | 1.290                   | 1.306                       | 0.02                    |                            | HD3                       | 3.584                    | 3.584                       | 0.00                |      |
|                           | <sup>13</sup> C $\alpha$              | 47.722                  | 47.688                      | -0.03                   |                            | <sup>13</sup> C $\alpha$  | 60.135                   | 60.144                      | 0.01                |      |
|                           | <sup>13</sup> C $\beta$               | 15.327                  | 15.310                      | -0.02                   |                            | <sup>13</sup> C $\beta$   | 29.903                   | 29.233                      | -0.67               |      |
| Pro8                      | <sup>1</sup> H $\alpha$               | 4.342                   | 4.348                       | 0.01                    | <sup>13</sup> C $\gamma$   | 24.733                    | 24.518                   | -0.22                       |                     |      |
|                           | <sup>1</sup> Q $\beta$ <sup>[a]</sup> | 2.215                   | 2.207                       | -0.01                   |                            | <sup>13</sup> C $\delta$  | 48.752                   | 47.683                      | -1.07               |      |
|                           | <sup>1</sup> H $\gamma_2$             | 1.958                   | 1.955                       | 0.00                    |                            | Lys11                     | <sup>1</sup> H $\alpha$  | 4.265                       | 4.272               | 0.01 |
|                           | <sup>1</sup> H $\gamma_3$             | -                       | 1.828                       | -0.13                   |                            |                           | <sup>1</sup> H $\beta_2$ | 1.766                       | 1.777               | 0.01 |
|                           | <sup>1</sup> H $\delta_2$             | 3.727                   | 3.729                       | 0.00                    |                            |                           | <sup>1</sup> H $\beta_3$ | 1.686                       | 1.696               | 0.01 |
| <sup>1</sup> H $\delta_3$ | 3.572                                 | 3.570                   | 0.00                        | <sup>1</sup> Q $\gamma$ | 1.310                      |                           | 1.311                    | 0.00                        |                     |      |
| Pro8                      | <sup>13</sup> C $\alpha$              | 59.849                  | 59.798                      | -0.05                   | <sup>1</sup> Q $\delta$    | 1.382                     | 1.385                    | 0.00                        |                     |      |
|                           | <sup>13</sup> C $\beta$               | 29.870                  | 29.313                      | -0.56                   | <sup>1</sup> Q $\epsilon$  | 2.757                     | 2.815                    | 0.06                        |                     |      |
|                           | <sup>13</sup> C $\gamma$              | 24.642                  | 24.476                      | -0.17                   | <sup>13</sup> C $\alpha$   | 53.607                    | 53.492                   | -0.12                       |                     |      |
|                           | <sup>13</sup> C $\delta$              | 47.690                  | 0.000                       | 0.00                    | <sup>13</sup> C $\beta$    | 30.390                    | 30.312                   | -0.08                       |                     |      |
|                           | Ala9                                  | <sup>1</sup> H $\alpha$ | 4.508                       | 4.524                   | 0.02                       | <sup>13</sup> C $\gamma$  | 22.190                   | 22.210                      | 0.02                |      |
| <sup>1</sup> Q $\beta$    |                                       | 1.299                   | 1.300                       | 0.00                    | <sup>13</sup> C $\delta$   | 29.094                    | 29.104                   | 0.01                        |                     |      |
| <sup>13</sup> C $\alpha$  |                                       | 47.527                  | 47.584                      | 0.06                    | <sup>13</sup> C $\epsilon$ | 39.683                    | 39.392                   | -0.29                       |                     |      |
| <sup>13</sup> C $\beta$   |                                       | 15.330                  | 16.422                      | 1.09                    | Lsy12                      | <sup>1</sup> H $\alpha$   | 4.229                    | 4.227                       | 0.00                |      |

<sup>[a]</sup> Q= Equivalent protons.

**Table S3.** (Continuation) Resonance assignments for H2B<sub>1-31</sub> (free and Ni<sup>2+</sup>-bound state) and chemical shifts differences at pH 10.1, 298K (ppm related to TMS).

| Residue | Atom                                   | Free/ppm | Ni <sup>2+</sup> -bound/ppm | $\Delta\delta$ /ppm | Residue | Atom                       | Free/ppm | Ni <sup>2+</sup> -bound/ppm | $\Delta\delta$ /ppm |
|---------|----------------------------------------|----------|-----------------------------|---------------------|---------|----------------------------|----------|-----------------------------|---------------------|
| Lys12   | <sup>1</sup> H $\beta_2$               | 1.756    | 1.734                       | -0.02               | Lys15   | <sup>1</sup> Q $\epsilon$  | 2.760    | 2.931                       | 0.17                |
|         | <sup>1</sup> H $\beta_3$               | 1.678    | -                           | -                   |         | <sup>13</sup> C $\alpha$   | 53.684   | 54.130                      | 0.45                |
|         | <sup>1</sup> H $\gamma_2$              | 1.383    | 1.316                       | -0.07               |         | <sup>13</sup> C $\beta$    | 30.378   | 30.378                      | 0.00                |
|         | <sup>1</sup> H $\gamma_3$              | 1.333    | -                           | -                   |         | <sup>13</sup> C $\gamma$   | 22.361   | 22.361                      | 0.00                |
|         | <sup>1</sup> Q $\delta$ <sup>[a]</sup> | 1.493    | 1.525                       | 0.03                |         | <sup>13</sup> C $\delta$   | 29.100   | 29.100                      | 0.00                |
|         | <sup>1</sup> Q $\epsilon$              | 2.744    | 2.929                       | 0.19                |         | <sup>13</sup> C $\epsilon$ | 40.839   | 40.839                      | 1.27                |
|         | <sup>13</sup> C $\alpha$               | 53.581   | 53.862                      | 0.28                | Lys16   | <sup>1</sup> H $\alpha$    | 4.208    | 4.166                       | -0.04               |
|         | <sup>13</sup> C $\beta$                | 30.293   | 30.355                      | 0.06                |         | <sup>1</sup> H $\beta_2$   | 1.742    | 2.032                       | 0.29                |
|         | <sup>13</sup> C $\gamma$               | 22.235   | 22.276                      | 0.04                |         | <sup>1</sup> H $\beta_3$   | 1.695    | -                           | 0.34                |
|         | <sup>13</sup> C $\delta$               | 28.406   | 27.964                      | -0.44               |         | <sup>1</sup> H $\gamma_2$  | 1.380    | 1.707                       | 0.33                |
|         | <sup>13</sup> C $\epsilon$             | 39.618   | 40.922                      | 1.30                |         | <sup>1</sup> H $\gamma_3$  | 1.318    | 1.629                       | 0.31                |
| Gly13   | <sup>1</sup> Q $\alpha$                | 3.911    | 3.875                       | -0.04               |         | <sup>1</sup> Q $\delta$    | 1.524    | 1.800                       | 0.28                |
|         | <sup>13</sup> C $\alpha$               | 42.188   | 42.672                      | 0.48                |         | <sup>1</sup> Q $\epsilon$  | 2.785    | 3.043                       | 0.26                |
| Ser14   | <sup>1</sup> H $\alpha$                | 4.396    | 3.958                       | -0.44               |         | <sup>13</sup> C $\alpha$   | 53.907   | 53.461                      | -0.45               |
|         | <sup>1</sup> Q $\beta$                 | 3.799    | 3.563                       | -0.24               |         | <sup>13</sup> C $\beta$    | 30.259   | 31.462                      | 1.20                |
|         | <sup>13</sup> C $\alpha$               | 55.530   | -                           | -                   |         | <sup>13</sup> C $\gamma$   | 22.248   | 22.060                      | -0.19               |
|         | <sup>13</sup> C $\beta$                | 61.125   | -                           | -                   |         | <sup>13</sup> C $\delta$   | 28.241   | -                           | -                   |
| Lys15   | <sup>1</sup> H $\alpha$                | 4.249    | 4.178                       | -0.07               |         | <sup>13</sup> C $\epsilon$ | 39.588   | 41.800                      | 2.21                |
|         | <sup>1</sup> H $\beta_2$               | 1.764    | -                           | 2.41                | Ala17   | <sup>1</sup> H $\alpha$    | 4.267    | 4.420                       | 0.15                |
|         | <sup>1</sup> H $\beta_3$               | 1.691    | 1.713                       | 0.02                |         | <sup>1</sup> Q $\beta$     | 1.310    | 0.908                       | -0.40               |
|         | <sup>1</sup> Q $\gamma$                | 1.371    | 1.283                       | -0.09               |         | <sup>13</sup> C $\alpha$   | 49.611   | 50.911                      | 1.30                |
|         | <sup>1</sup> Q $\delta$                | 1.515    | 1.391                       | -0.12               |         | <sup>13</sup> C $\beta$    | 16.379   | -                           | -                   |

<sup>[a]</sup> Q= Equivalent protons.

**Table S3.** (Continuation) Resonance assignments for H2B<sub>1-31</sub> (free and Ni<sup>2+</sup>-bound state) and chemical shifts differences at pH 10.1, 298K (ppm related to TMS).

| Residue | Atom                                     | Free/ppm | Ni <sup>2+</sup> -bound/ppm | $\Delta\delta$ /ppm | Residue                 | Atom                       | Free/ppm | Ni <sup>2+</sup> -bound/ppm | $\Delta\delta$ /ppm |
|---------|------------------------------------------|----------|-----------------------------|---------------------|-------------------------|----------------------------|----------|-----------------------------|---------------------|
| Val18   | <sup>1</sup> H $\alpha$                  | 4.101    | 3.004                       | -1.10               | Lys20                   | <sup>13</sup> C $\beta$    | 30.330   | 30.514                      | 0.18                |
|         | <sup>1</sup> H $\beta$                   | 2.026    | 1.304                       | -0.72               |                         | <sup>13</sup> C $\gamma$   | 22.133   | -                           | -                   |
|         | <sup>1</sup> Q $\gamma_2$ <sup>[a]</sup> | 0.893    | 1.024                       | 0.13                |                         | <sup>13</sup> C $\delta$   | 27.989   | -                           | -                   |
|         | <sup>1</sup> Q $\gamma_3$                | 0.880    |                             | 0.14                |                         | <sup>13</sup> C $\epsilon$ | 39.529   | -                           | -                   |
|         | <sup>13</sup> C $\alpha$                 | 59.532   | 53.743                      | -5.79               | Ala21                   | <sup>1</sup> H $\alpha$    | 4.209    | 3.575                       | -0.63               |
|         | <sup>13</sup> C $\beta$                  | 30.060   | 29.074                      | -0.99               |                         | <sup>1</sup> Q $\beta$     | 1.291    | 1.391                       | 0.10                |
|         | <sup>13</sup> C $\gamma_1$               | 17.725   | 18.505                      | 0.78                |                         | <sup>13</sup> C $\alpha$   | 49.883   | -                           | -                   |
|         | <sup>13</sup> C $\gamma_2$               | 18.387   |                             | 0.12                |                         | <sup>13</sup> C $\beta$    | 16.483   | 16.327                      | -0.16               |
| Thr19   | <sup>1</sup> H $\alpha$                  | 4.277    | 5.076                       | 0.80                | Gln22                   | <sup>1</sup> H $\alpha$    | 4.234    | 3.045                       | -1.19               |
|         | <sup>1</sup> H $\beta$                   | 4.136    | 2.935                       | -1.20               |                         | <sup>1</sup> H $\beta_2$   | 2.023    | 1.815                       | -0.21               |
|         | <sup>1</sup> Q $\gamma_2$                | 1.148    | 1.380                       | 0.23                |                         | <sup>1</sup> H $\beta_3$   | 1.938    | -                           | -0.12               |
|         | <sup>13</sup> C $\alpha$                 | 58.977   | -                           | -                   | <sup>1</sup> Q $\gamma$ | 2.323                      | 2.239    | -0.08                       |                     |
|         | <sup>13</sup> C $\beta$                  | 67.092   | 61.066                      | -6.03               | Gln22                   | <sup>13</sup> C $\alpha$   | 53.106   | 55.650                      | 2.54                |
|         | <sup>13</sup> C $\gamma_2$               | 18.786   | 16.359                      | -2.43               |                         | <sup>13</sup> C $\beta$    | 26.823   | 29.247                      | 2.42                |
| Lys20   | <sup>1</sup> H $\alpha$                  | 4.213    | 3.957                       | -0.26               |                         | <sup>13</sup> C $\gamma$   | 30.998   | 33.317                      | 2.32                |
|         | <sup>1</sup> H $\beta_2$                 | 1.757    | 1.738                       | -0.02               | Lys23                   | <sup>1</sup> H $\alpha$    | 4.209    | 3.626                       | -0.58               |
|         | <sup>1</sup> H $\beta_3$                 | 1.694    | 1.808                       | 0.11                |                         | <sup>1</sup> H $\beta_2$   | 1.735    | 1.892                       | 0.16                |
|         | <sup>1</sup> Q $\gamma$                  | 1.366    | 2.058                       | 0.69                |                         | <sup>1</sup> H $\beta_3$   | 1.694    | -                           | 0.20                |
|         | <sup>1</sup> Q $\delta$                  | 1.538    | -                           | -                   |                         | <sup>1</sup> Q $\gamma$    | 1.322    | 1.740                       | 0.42                |
|         | <sup>1</sup> H $\epsilon_2$              | 2.770    | 3.446                       | 0.68                |                         | <sup>1</sup> Q $\delta$    | 1.512    | 1.510                       | 0.00                |
|         | <sup>1</sup> H $\epsilon_3$              | -        | 3.239                       | 0.47                |                         | <sup>1</sup> Q $\epsilon$  | 2.740    | 3.150                       | 0.41                |
|         | <sup>13</sup> C $\alpha$                 | 53.758   | 64.993                      | 11.24               |                         | <sup>13</sup> C $\alpha$   | 53.828   | 58.289                      | 4.46                |

<sup>[a]</sup> Q= Equivalent protons.

**Table S3.** (Continuation) Resonance assignments for H2B<sub>1-31</sub> (free and Ni<sup>2+</sup>-bound state) and chemical shifts differences at pH 10.1, 298K (ppm related to TMS).

| Residue | Atom                                   | Free/ppm | Ni <sup>2+</sup> -bound/ppm | $\Delta\delta$ /ppm | Residue | Atom                       | Free/ppm | Ni <sup>2+</sup> -bound/ppm | $\Delta\delta$ /ppm |
|---------|----------------------------------------|----------|-----------------------------|---------------------|---------|----------------------------|----------|-----------------------------|---------------------|
| Lys23   | <sup>13</sup> C $\beta$                | 30.297   | -                           | -                   | Lys27   | <sup>1</sup> H $\alpha$    | 4.218    | 4.204                       | -0.01               |
|         | <sup>13</sup> C $\gamma$               | 22.210   | 22.128                      | -0.08               |         | <sup>1</sup> H $\beta_2$   | 1.753    | -                           | 2.45                |
|         | <sup>13</sup> C $\delta$               | 28.304   | 27.853                      | -0.45               |         | <sup>1</sup> H $\beta_3$   | 1.686    | 1.700                       | 0.01                |
|         | <sup>13</sup> C $\epsilon$             | 39.500   | 40.433                      | 0.93                |         | <sup>1</sup> Q $\gamma$    | 1.315    | 1.384                       | 0.07                |
| Lys24   | <sup>1</sup> H $\alpha$                | 4.235    | 3.562                       | -0.06               |         | <sup>1</sup> Q $\delta$    | 1.512    | 1.321                       | -0.19               |
|         | <sup>1</sup> H $\beta_2$               | 1.755    | 2.086                       | 0.33                |         | <sup>1</sup> Q $\epsilon$  | 2.754    | 2.922                       | 0.17                |
|         | <sup>1</sup> H $\beta_3$               | 1.709    | -                           | 0.38                |         | <sup>13</sup> C $\alpha$   | 53.842   | 53.438                      | -0.40               |
|         | <sup>1</sup> Q $\gamma$ <sup>[a]</sup> | 1.377    | 1.545                       | 0.17                |         | <sup>13</sup> C $\beta$    | 30.428   | 30.355                      | -0.07               |
|         | <sup>1</sup> Q $\delta$                | 1.507    | 1.545                       | 0.04                |         | <sup>13</sup> C $\gamma$   | 22.266   | 22.129                      | -0.14               |
|         | <sup>1</sup> Q $\epsilon$              | 2.747    | 2.794                       | 0.05                |         | <sup>13</sup> C $\delta$   | 28.381   | 29.013                      | 0.63                |
|         | <sup>13</sup> C $\alpha$               | 53.731   | 62.060                      | 8.33                |         | <sup>13</sup> C $\epsilon$ | 39.581   | 40.910                      | 1.33                |
|         | <sup>13</sup> C $\beta$                | 30.348   | 26.808                      | -3.54               | Lys28   | <sup>1</sup> H $\alpha$    | 4.194    | 4.194                       | 0.00                |
|         | <sup>13</sup> C $\gamma$               | 22.046   | 22.110                      | 0.06                |         | <sup>1</sup> Q $\beta$     | 1.712    | 1.747                       | 0.04                |
|         | <sup>13</sup> C $\delta$               | 28.443   | 27.902                      | -0.54               |         | <sup>1</sup> Q $\gamma$    | 1.375    | 1.375                       | 0.00                |
|         | <sup>13</sup> C $\epsilon$             | 39.559   | 39.486                      | -0.07               |         | <sup>1</sup> Q $\delta$    | 1.519    | 1.560                       | 0.04                |
| Asp25   | <sup>1</sup> H $\alpha$                | 4.512    | 3.589                       | -0.92               |         | <sup>1</sup> Q $\epsilon$  | 2.753    | 2.816                       | 0.06                |
|         | <sup>1</sup> Q $\beta$                 | 2.627    | 3.190                       | 0.56                |         | <sup>13</sup> C $\alpha$   | 53.904   | 53.983                      | 0.08                |
|         | <sup>13</sup> C $\alpha$               | 51.632   | -                           | 0.00                |         | <sup>13</sup> C $\beta$    | 30.298   | 30.331                      | 0.03                |
|         | <sup>13</sup> C $\beta$                | 38.557   | -                           | 0.00                |         | <sup>13</sup> C $\gamma$   | 22.200   | 22.118                      | -0.08               |
| Gly26   | <sup>1</sup> H $\alpha_1$              | 3.892    | 2.985                       | -0.91               |         | <sup>13</sup> C $\delta$   | 28.425   | 27.446                      | -0.98               |
|         | <sup>1</sup> H $\alpha_2$              | 3.841    | 2.895                       | -0.95               |         | <sup>13</sup> C $\epsilon$ | 39.617   | 39.404                      | -0.21               |
|         | <sup>13</sup> C $\alpha$               | 42.788   | -                           | -                   | Arg29   | <sup>1</sup> H $\alpha$    | 4.224    | 4.225                       | 0.00                |

<sup>[a]</sup> Q= Equivalent protons.

**Table S3.** (Continuation) Resonance assignments for H2B<sub>1-31</sub> (free and Ni<sup>2+</sup>-bound state) and chemical shifts differences at pH 10.1, 298K (ppm related to TMS).

| Residue | Atom                                   | Free/ppm | Ni <sup>2+</sup> -bound/ppm | $\Delta\delta$ /ppm | Residue                  | Atom                       | Free/ppm | Ni <sup>2+</sup> -bound/ppm | $\Delta\delta$ /ppm |
|---------|----------------------------------------|----------|-----------------------------|---------------------|--------------------------|----------------------------|----------|-----------------------------|---------------------|
| Arg29   | <sup>1</sup> H $\beta_2$               | 1.797    | 1.798                       | 0.00                | Arg31                    | <sup>13</sup> C $\alpha$   | 53.558   | 53.535                      | -0.02               |
|         | <sup>1</sup> H $\beta_3$               | 1.708    | 1.713                       | 0.01                |                          | <sup>13</sup> C $\beta$    | 30.223   | 30.366                      | 0.14                |
|         | <sup>1</sup> Q $\gamma$ <sup>[a]</sup> | 1.614    | 1.592                       | -0.02               |                          | <sup>13</sup> C $\gamma$   | 22.137   | 22.120                      | -0.02               |
|         | <sup>1</sup> Q $\delta$                | 3.159    | 3.155                       | 0.00                |                          | <sup>13</sup> C $\delta$   | 28.485   | 27.627                      | -0.86               |
|         | <sup>13</sup> C $\alpha$               | 53.783   | 53.798                      | 0.02                |                          | <sup>13</sup> C $\epsilon$ | 39.007   | 39.474                      | 0.47                |
|         | <sup>13</sup> C $\beta$                | 28.082   | 28.140                      | 0.06                |                          | <sup>1</sup> H $\alpha$    | 4.241    | 4.247                       | 0.01                |
|         | <sup>13</sup> C $\gamma$               | 24.471   | 24.404                      | -0.07               |                          | <sup>1</sup> H $\beta_2$   | 1.778    | 1.778                       | 0.00                |
|         | <sup>13</sup> C $\delta$               | 40.437   | 40.489                      | 0.05                |                          | <sup>1</sup> H $\beta_3$   | 1.688    | 1.686                       | 0.00                |
| Lys30   | <sup>1</sup> H $\alpha$                | 4.203    | 4.204                       | 0.00                | <sup>1</sup> Q $\gamma$  | 1.556                      | 1.555    | 0.00                        |                     |
|         | <sup>1</sup> H $\beta_2$               | 1.752    | 1.772                       | 0.02                | <sup>1</sup> Q $\delta$  | 3.137                      | 3.136    | 0.00                        |                     |
|         | <sup>1</sup> H $\beta_3$               | 1.691    | 1.718                       | 0.03                | <sup>13</sup> C $\alpha$ | 53.751                     | 53.726   | -0.02                       |                     |
|         | <sup>1</sup> Q $\gamma$                | 1.315    | 1.358                       | 0.04                | <sup>13</sup> C $\beta$  | 28.230                     | 28.049   | -0.18                       |                     |
|         | <sup>1</sup> Q $\delta$                | 1.508    | 1.563                       | 0.05                | <sup>13</sup> C $\gamma$ | 24.386                     | 24.463   | 0.08                        |                     |
|         | <sup>1</sup> Q $\epsilon$              | 2.742    | 2.818                       | 0.08                | <sup>13</sup> C $\delta$ | 40.599                     | 40.489   | -0.11                       |                     |

<sup>[a]</sup> Q= Equivalent protons.

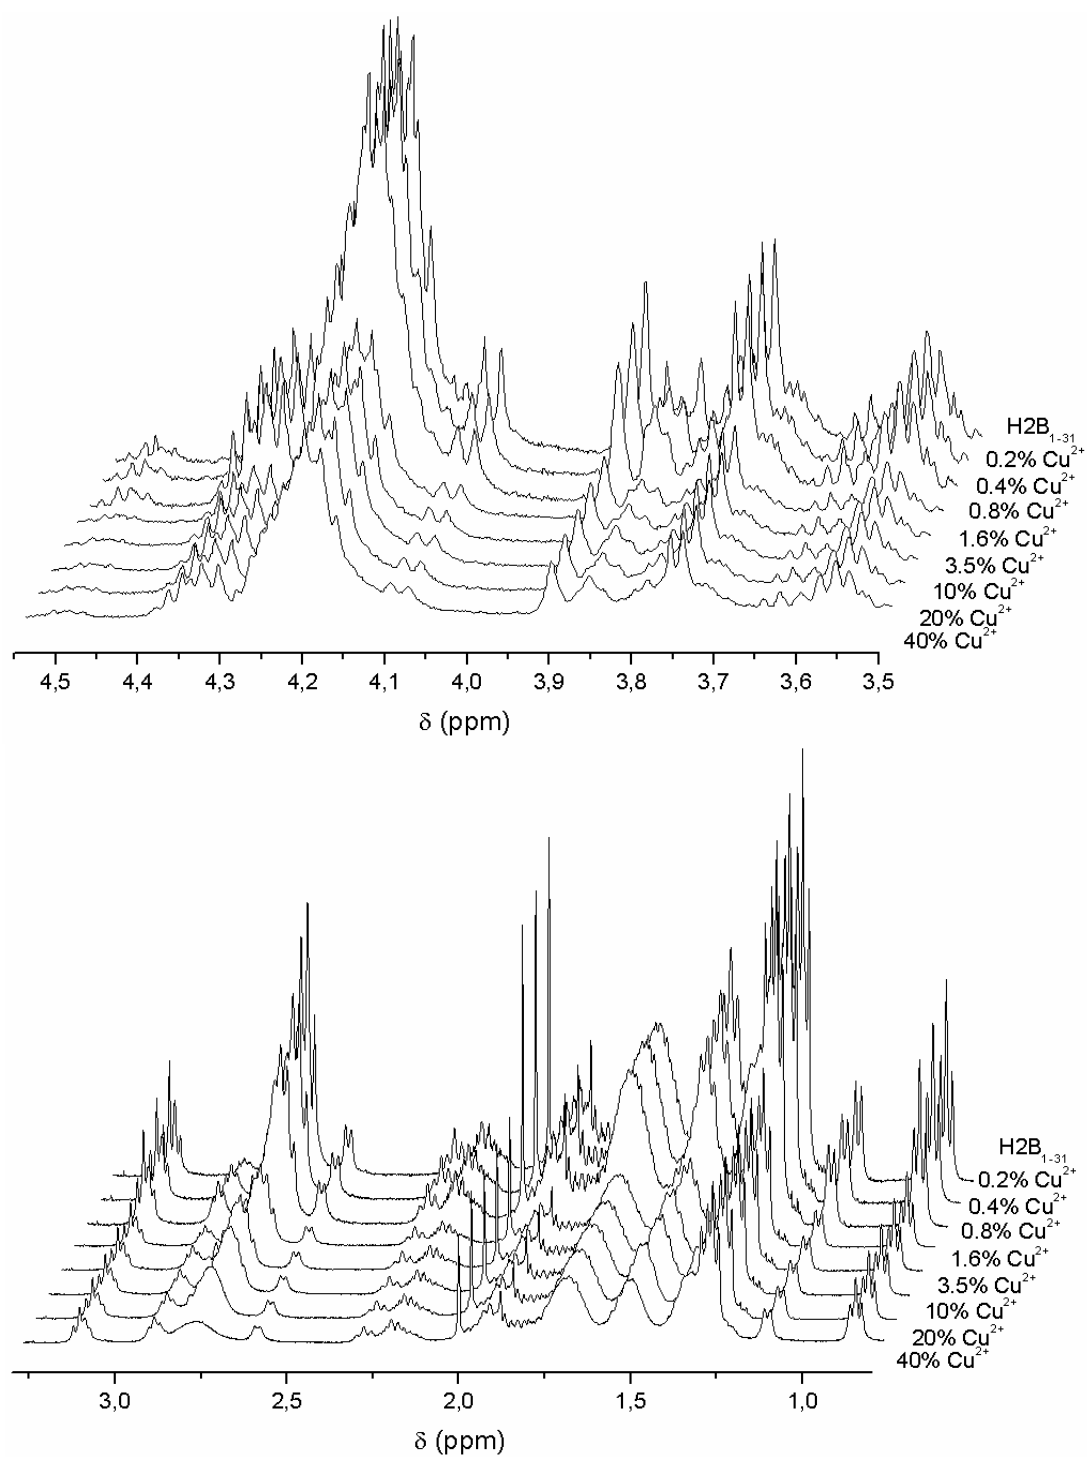

**Figure S2**  $^1\text{H}$  NMR stack plot showing the effect of  $\text{Cu}^{2+}$  addition to  $\text{H2B}_{1-31}$  signals (2 mM in 99.9 %  $\text{D}_2\text{O}$ , at pH 10.1, 298 K).  $\text{CuCl}_2 \cdot 2\text{H}_2\text{O}$  was added in aliquots reaching 0.002, 0.004, 0.008, 0.016, 0.035, 0.01, 0.02 and 0.04 mole-equivalents of  $\text{Cu}^{2+}$ .

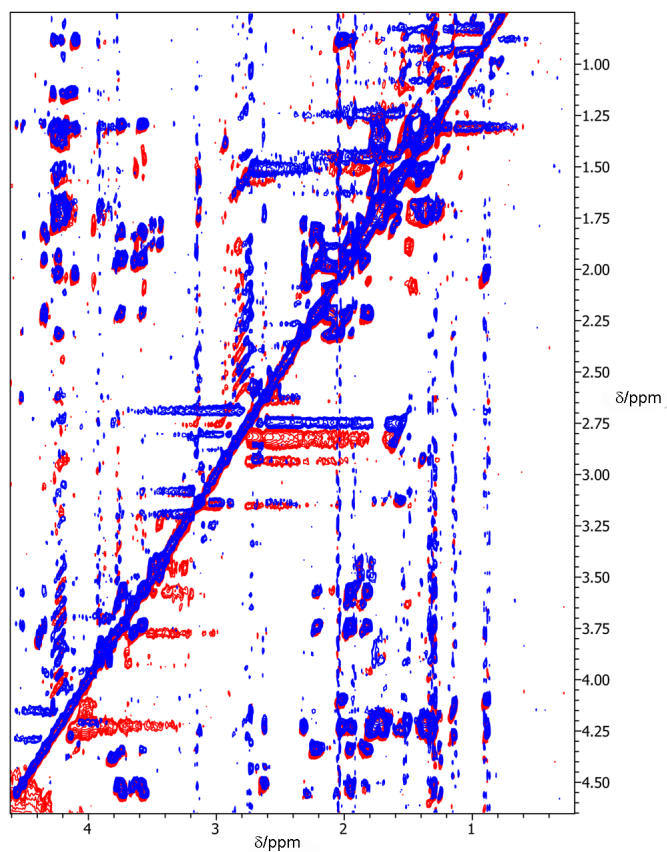

**Figure S3.** Overlaid aliphatic region of the free  $\text{H2B}_{1-31}$  (blue) and  $\text{Ni}^{2+}$ -bound  $\text{H2B}_{1-31}$  (red) of  $[\text{}^1\text{H}-\text{}^1\text{H}]$ -NOESY spectra at a peptide to nickel molar ratio of 1.1:1, at pH 10.1, 298 K.

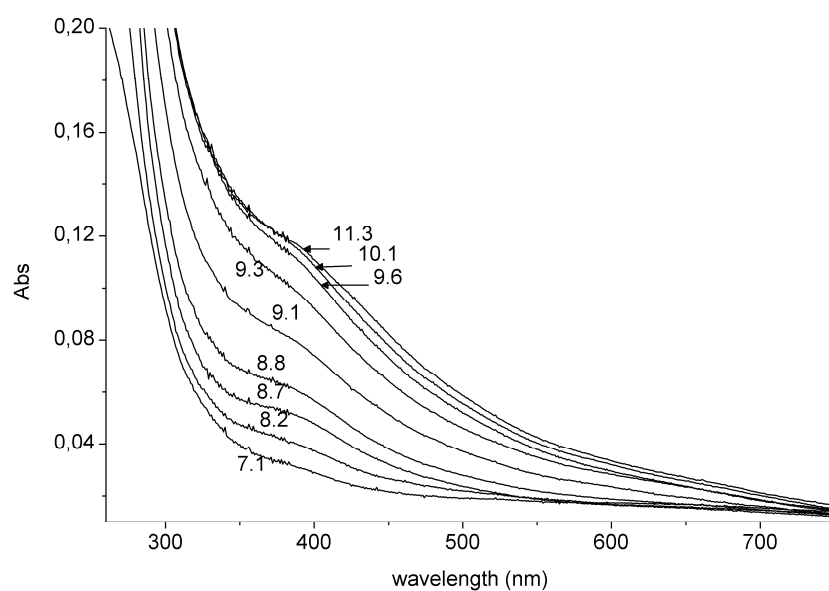

**Figure S4.** UV/Vis spectra of the  $\text{Ni}^{2+}$ :  $\text{H2B}_{1-31}$  system, at various pH values with a molar ratio of 1:1.1 (0.6 mM), at 298 K and  $I = 0.2 \text{ M}$  (KCl).



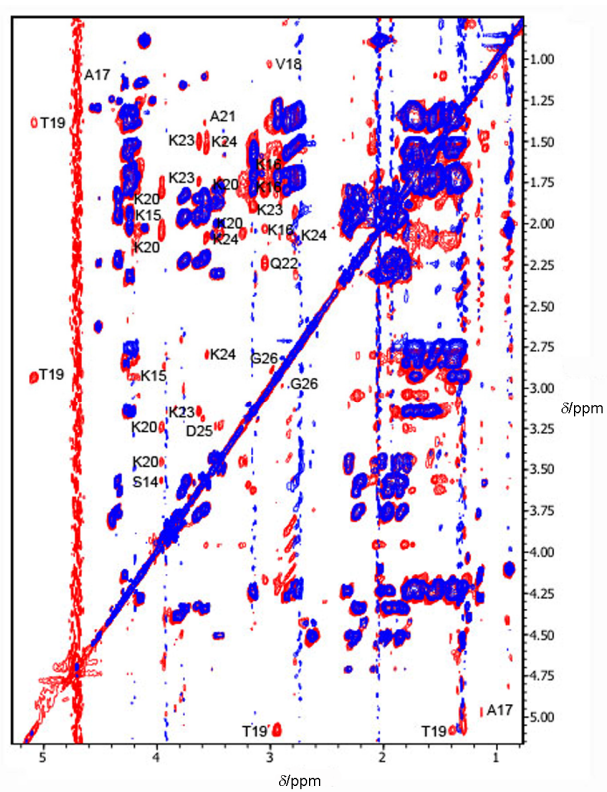

**Figure S5.** Overlaid aliphatic region of the free H2B<sub>1-31</sub> (blue) and Ni<sup>2+</sup>-bound H2B<sub>1-31</sub> (red) TOCSY spectra at a peptide to nickel molar ratio of 1.1: 1 (pH 10.1, 298 K). New resonances due to Ni<sup>2+</sup> binding have been labelled.
